# Supplementary material for: Paucity of chimeric gene-transposable element transcripts in the Drosophila melanogaster genome
Source: PubMed Central journal article supplement (PMC1308810; doi:10.1186/1741-7007-3-24), 2005-11-12

Additional file 2. Example of log-likelihood function [equation (1)] for estimating population frequencies from pool frequencies. This example shows the likelihood surface for the three possible combinations of  $x$ 's that yield a total of 4 pools with detected element presence [i.e. for  $(x_1, x_2)$  equal to  $(0, 4)$ ,  $(1, 3)$ , and  $(2, 2)$ ]. This example demonstrates that, given that the element is present in 4 out of 6 pools, estimation of population frequencies is relatively insensitive to the number of pools that contain 8 or 12 strains. As a consequence, we combined all combinations of  $x_1$  and  $x_2$  under a common category to simplify the analysis.

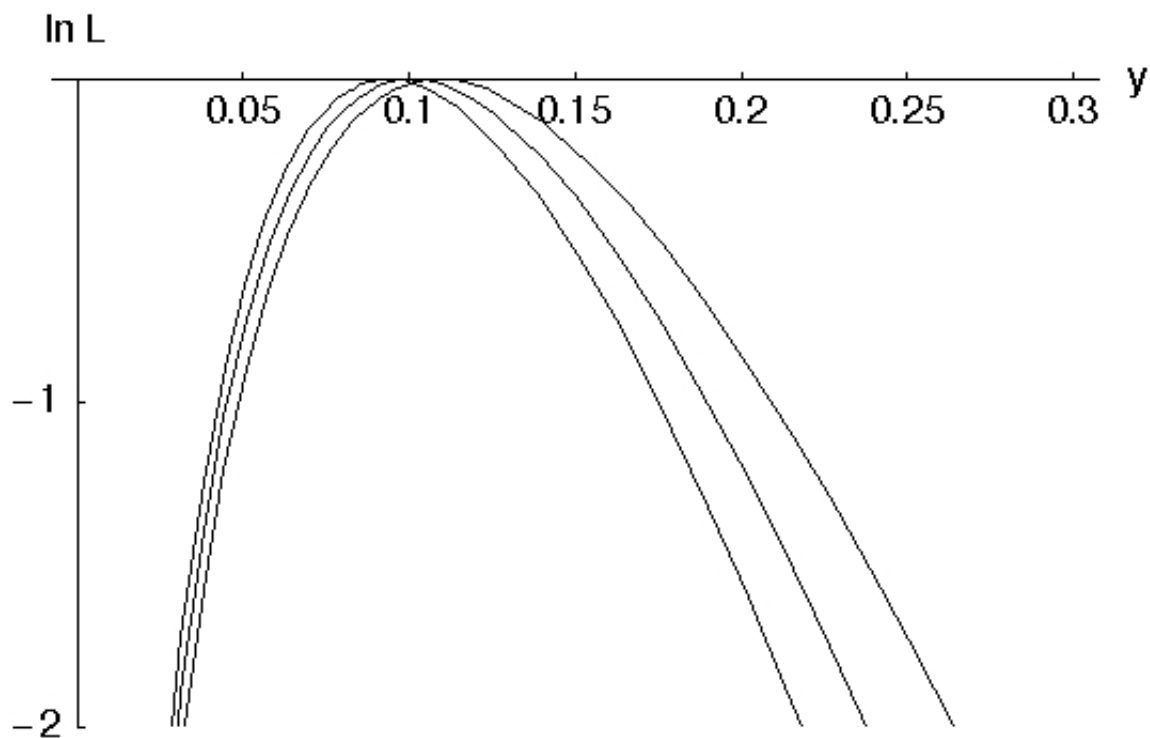

Supplement: 1741-7007-3-24-S2.pdf [file 1741-7007-3-24-S2.pdf]
